# Supplementary material for: A novel PD-L1-targeted shark VNAR single-domain-based CAR-T cell strategy for treating breast cancer and liver cancer
Source: PubMed Central journal article supplement (PMC8917269; doi:10.1016/j.omto.2022.02.015), 2022-02-20
Supplement: mmc1.pdf [file mmc1.pdf]

OMTO, Volume 24

## Supplemental information

**A novel PD-L1-targeted shark V<sub>NAR</sub>  
single-domain-based CAR-T cell strategy  
for treating breast cancer and liver cancer**

**Dan Li, Hejiao English, Jessica Hong, Tianyuzhou Liang, Glenn Merlino, Chi-Ping Day, and Mitchell Ho**

## **Supplementary materials**

### **Cell culture**

We obtained human breast cancer cell line MDA-MB-231, human ovarian cancer (OC) cells lines IGROV-1 and NCI-ADR-RES, human pancreatic cancer (PDAC) cell lines KLM1, Panc-1, and SU8686, and lung cancer cell line H522 from American Type Culture Collection (ATCC). OVCAR8 (ovarian cancer) and EK VX (non-small cell lung cancer, or NSCLC) were obtained from National Cancer Institute (Development Therapeutics Program). Steven M. Albelda provided L55 (NSCLC) at the University of Pennsylvania (Philadelphia, PA). MDA-MB-231 was transduced with a lentiviral vector encoding a GFP-firefly-luciferase (GFP-Luc) following our protocol.<sup>1</sup> PD-L1 knockout (KO) MDA-MB-231 cell line was constructed in the present study using clustered regularly interspaced short palindromic repeats (CRISPR)/CRISPR-associated protein 9 (CRISPR-Cas9) method. We generated the construct following the design principle as described previously.<sup>2</sup> Briefly, two single-guide RNAs (sgRNAs) targeted endogenous PD-L1 promoter (predicted from the EPD database) were designed and used to subclone into a LentiCRISPRv2 vector (Addgene plasmid #52961) and sorted to generate single clones by flow cytometry. Glenn Merlino (NCI) provided the murine melanoma cell line B8979HC (induced in an HGF-tg;CDKN2A<sup>fl/fl</sup>;Tyr-CreERT2-tg mouse by UV and tamoxifen) and the canine tumor cell line Jones. Hep3B was obtained from ATCC, and Hep3B overexpressed GFP-Luc cell line was established in a previous study.<sup>3</sup> MDA-MB-231 and Hep3B cells were cultured in DMEM supplemented with 10% FBS, 1% L-glutamine, and 1% penicillin–streptomycin; other cell lines mentioned above were cultured in RPMI. Cells were maintained in a humidified atmosphere containing 5% CO<sub>2</sub> at 37°C.

### **Phage panning**

We conducted phage panning following our laboratory protocol.<sup>4,5</sup> The Nunc 96-well Maxisorp plate (Thermo Scientific) was coated with 100 µg/ml mPD-L1 in PBS overnight at 4°C. Subsequently, the plate was blocked with 2% bovine serum albumin in PBS for 1 hour at room temperature. Then 10<sup>10</sup>-10<sup>11</sup> CFU

of pre-blocked phage supernatant in blocking buffer was added to each well for 1 hour at room temperature to allow binding. After four rounds of panning, the enriched bound phages were eluted with 100  $\mu$ l pH 2.0 elution buffer at room temperature after four washes with PBS containing 0.05% Tween-20. The eluate was neutralized with 30  $\mu$ l of 1 M Tris-HCl buffer (pH 8.5) and was used to infect freshly prepared *E. coli* TG1 cells. Single colonies were picked after four rounds of panning and identified by phage ELISA.

### **Antibody production and purification**

The soluble antibody protein-his-flag was produced and purified as previously described.<sup>6</sup> Briefly, the coding sequences of PD-L1 specific  $V_{NARS}$  in the pComb3x phagemids were transformed into HB2151 *E. coli* cells. The colonies were pooled for culture in 2 L 2YT media containing 2% glucose, 100  $\mu$ g/ml ampicillin at 37°C until the OD600 reached 0.8–1. Culture media was then replaced with 2YT media containing 1mM IPTG (Sigma), 100  $\mu$ g/ml ampicillin, and was shaken at 30°C overnight for soluble protein production. The bacteria pellet was spun down and lysed with polymyxin B (Sigma) for 1 h at 37°C to release the soluble protein. The supernatant was harvested after lysis, and purified using the HisTrap column (Cytiva/GE Healthcare) using AKTA.

### **Affinity binding and blocking activity**

All experiments were performed on an Octet instrument (ForteBio) at 30°C and reagents were prepared in 0.5% BSA, 0.1% Tween20 PBS, pH 7.4 buffer. hPD-L1-his protein was immobilized onto Ni-NTA sensor tips at 5  $\mu$ g/ml for 120 s. The antigen-coated tips are then dipped into the buffer to stabilize the curve and subsequently dipped into 100 nM or 50 nM B2-hFc or F5-hFc for association and dissociation measurements for a time window of 180 s and 300 s. To detect the blocking activity of B2-hFc, hPD-L1-his protein was firstly loaded onto the Ni-NTA sensor tips. Subsequently, the sensor tips were dipped into wells containing 500 nM of  $V_{NAR}$ -hFc for 300 s, followed by 500 nM hPD-1-hFc protein (Sino Biological)

for 300 s, and lastly 300 s of dissociation in the buffer. Raw data was processed using Octet Data Analysis Software 9.0.

## **ELISA**

The phage ELISA was performed as previously described<sup>6</sup>. Briefly, the Nunc 96-well Maxisorp plate was coated with 5 µg/ml antigenic proteins, including mPD-L1-his, mPD-L1-hFc, hPD-L1-his, hPD-L1-hFc, and the irrelevant antigen human IgG and PBS in 50 µl PBS per well overnight at 4°C. The plate was blocked with 2% BSA for 1 hour at room temperature. Pre-blocked phage supernatant was then added to the plate. The binding activity was determined with horseradish peroxidase (HRP)-conjugated mouse anti-M13 antibody (GE Healthcare). To test whether anti-PD-L1 V<sub>NARS</sub> can block the interaction of hPD-1 and hPD-L1, hPD-1-hFc was coated on 96-well Maxisorp plate overnight at 4°C. Coated wells were blocked with 2% BSA. After washing, the wells were incubated hPD-L1, 2 µg/ml V<sub>NAR</sub>-hFc (or PBS as control), and then HRP-conjugated anti-his antibody for detection. To detect whether a shark B2 V<sub>NAR</sub> is specific to human PD-L1, and not B7-H3, the antigenic proteins hPD-L1 and hB7-H3 were coated onto the 96-well Maxisorp plate. PD-L1 specific binder B2 and B7-H3 specific binder were used to measure the binding affinity and specificity to PD-L1 and B7-H3.

To predict the binding epitope of anti-PD-L1 shark V<sub>NARS</sub>, we designed total 24 peptides based on the hPD-L1 extracellular domain (ECD) amino acid sequence. Each synthesized peptide (produced by GenScript) was 18 AA in length with 9 AA overlapped, indicating the minimum antigenic region of hPD-L1 ECD recognized by the V<sub>NARS</sub> can be narrowed down by step-by-step peptide mapping onto a 9-mer peptide epitope. The ELISA was performed in this assay. In brief, a total of 24 peptides were coated onto the 96-well Maxisorp plate. 5 µg/ml B2-his-flag, A11-his-flag, and F5-his-flag were then added followed with HRP-conjugated anti-flag antibody. The binding activity was determined by OD<sub>450</sub>. Experiments were performed in triplicate and repeated three times with similar results.

## Flow cytometry

Surface PD-L1 expression was detected by anti-PD-L1 monoclonal antibody (Biolegend) and goat-anti-human IgG-PE (Jackson ImmunoResearch). Tumor cells were incubated with 10 µg/ml of each V<sub>NAR</sub>-his-flag, followed by incubation with mouse anti-flag conjugated with allophycocyanin (APC) (Jackson ImmunoResearch). 50 µg/ml IFN-γ was used to induce PD-L1 expression in Hep3B tumor cells *in vitro*. The transduction efficiency of CAR (B2) T cells was detected by surface anti-EGFR human monoclonal antibody cetuximab (Erbix) and goat-anti-human IgG conjugated with APC. 10 µg/ml recombinant PD-L1-hFc protein, GPC3-hFc, and goat-anti-human IgG conjugated with APC were used to test antigen-binding ability of CAR-T cells. T cell exhaustion was evaluated via PE PD-1, PE TIM-3, and PE LAG-3 (Thermo Fisher Scientific). 100 µl blood was collected from mice and 1X RBC lysis buffer (eBiosciences) was used to remove red blood cells. To determine the absolute number of CAR-T cells in mouse blood, BV711 CD3, Erbix, and goat-anti-human IgG conjugated with Alexa Fluor 488 CD8 (Biolegend) were used to stain CD3<sup>+</sup>CAR<sup>+</sup> T cells. Counting Beads 123count™ eBeads was used for counting the absolute number of cells. T cell immunophenotyping was performed by surface staining with antibodies against the following antigens: APC-H7 CD4, BV605 CD8, BV421 CD45RA, APC CD62L (BD Bioscience), and PE CD95 (Biolegend). Data acquisition was performed using SONY SA3800 (Sony Biotechnology) and analyzed using FloJo software (Tree Star).

## Western blot

Cells were lysed with ice-cold lysis buffer (Cell Signaling Technology), and total protein was isolated by centrifugation at 10,000g for 10 minutes at 4°C. Protein concentration was measured using a Bicinchoninic acid assay (Pierce) by the manufacturer's specifications. For each cell lysates of 20 µg, they were loaded onto a 4-20% SDS-PAGE gel for electrophoresis. Total protein was extracted from *in vivo* tumors derived from MDA-MB-231 or Hep3B mice. 10 µg cell lysates were used to detect the expression of PD-L1, GPC3, GFP, and β-Actin. The antibodies, including anti-human PDL1 mAb, anti-human GAPDH mAb, anti-GFP

mAb, and anti-human  $\beta$ -Actin mAb were obtained from Cell Signaling Technology. YP7 mAb, which our lab previously produced, was used to test GPC3 expression.<sup>7</sup>

## References

1. Feng, M., Zhang, J., Anver, M., Hassan, R., and Ho, M. (2011). In vivo imaging of human malignant mesothelioma grown orthotopically in the peritoneal cavity of nude mice. *Journal of Cancer* 2, 123-131. 10.7150/jca.2.123.
2. Li, N., Wei, L., Liu, X., Bai, H., Ye, Y., Li, D., Li, N., Baxa, U., Wang, Q., Lv, L., Chen, Y., et al. (2019). A Frizzled-Like Cysteine-Rich Domain in Glypican-3 Mediates Wnt Binding and Regulates Hepatocellular Carcinoma Tumor Growth in Mice. *Hepatology* 70, 1231-1245. 10.1002/hep.30646.
3. Li, D., Li, N., Zhang, Y.-F., Fu, H., Feng, M., Schneider, D., Su, L., Wu, X., Zhou, J., Mackay, S., Kramer, J., et al. (2020). Persistent Polyfunctional Chimeric Antigen Receptor T Cells That Target Glypican 3 Eliminate Orthotopic Hepatocellular Carcinomas in Mice. *Gastroenterology*. <https://doi.org/10.1053/j.gastro.2020.02.011>.
4. Ho, M., Kreitman, R.J., Onda, M., and Pastan, I. (2005). In vitro antibody evolution targeting germline hot spots to increase activity of an anti-CD22 immunotoxin. *J Biol Chem* 280, 607-617. 10.1074/jbc.M409783200.
5. Kim, H., and Ho, M. (2018). Isolation of Antibodies to Heparan Sulfate on Glypicans by Phage Display. *Curr Protoc Protein Sci* 94, e66. 10.1002/cpps.66.
6. Feng, M., Bian, H., Wu, X., Fu, T., Fu, Y., Hong, J., Fleming, B.D., Flajnik, M.F., and Ho, M. (2019). Construction and next-generation sequencing analysis of a large phage-displayed VNAR single-domain antibody library from six naive nurse sharks. *Antibody therapeutics* 2, 1-11. 10.1093/abt/tby011.
7. Phung, Y., Gao, W., Man, Y.G., Nagata, S., and Ho, M. (2012). High-affinity monoclonal antibodies to cell surface tumor antigen glypican-3 generated through a combination of peptide immunization and flow cytometry screening. *mAbs* 4, 592-599. 10.4161/mabs.20933.

Supplementary Figures

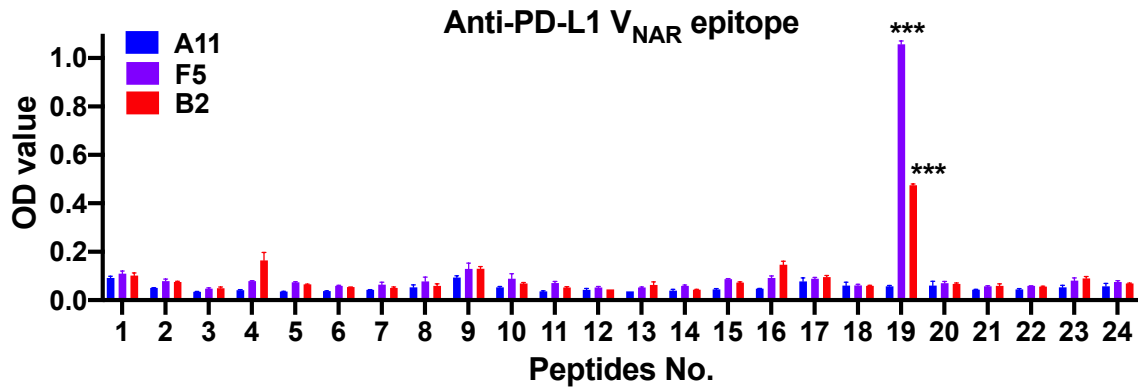

**Supplemental Figure 1.** Epitope mapping of individual anti-PD-L1 V<sub>NARS</sub> using truncation peptide arrays detected by ELISA. Total 24 peptides were designed based on hPD-L1 ECD. Each peptide is 18 amino acid in length and overlapped 9 AA with adjacent peptide.

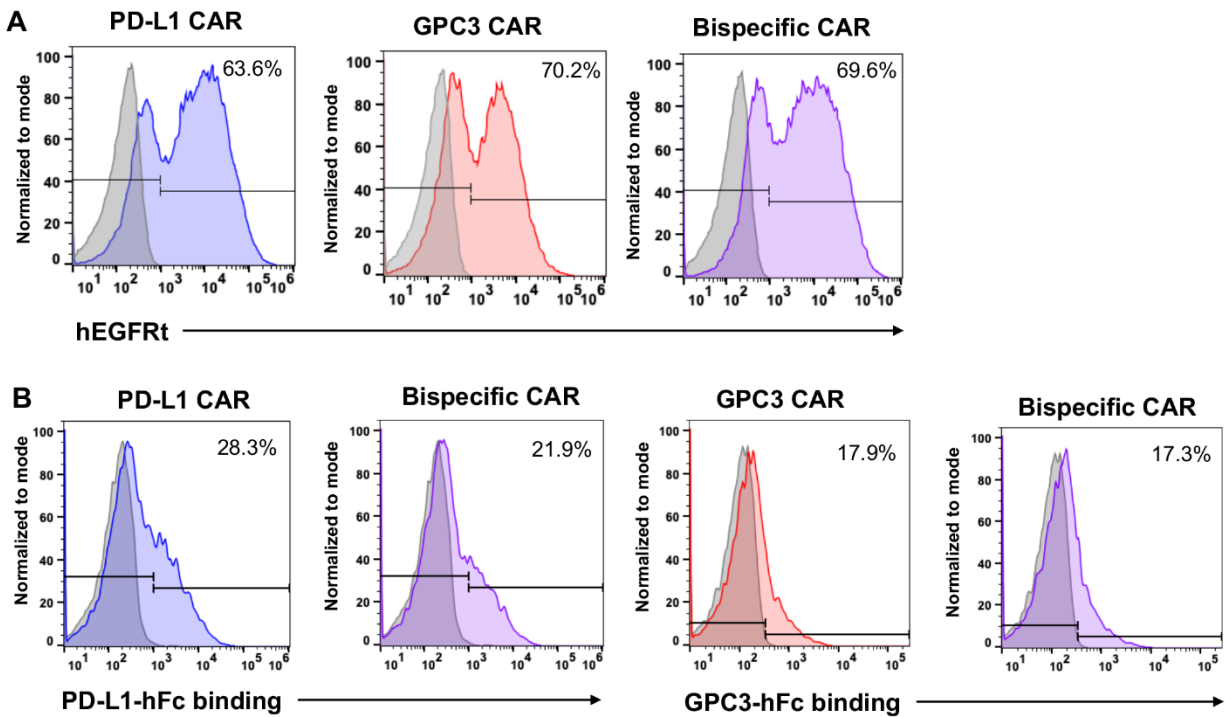

**Supplemental Figure 2.** CAR expression and antigen-binding ability of PD-L1 CAR (B2) T, GPC3 CAR-T, and bispecific CAR-T cells. (A) The CAR expression in T cells was detected by flow cytometry based on hEGFRt expression. (B) The antigen-binding (PD-L1-hFc and GPC3-hFc) ability of PD-L1 CAR (B2) T, GPC3 CAR-T, and bispecific CAR-T cells.

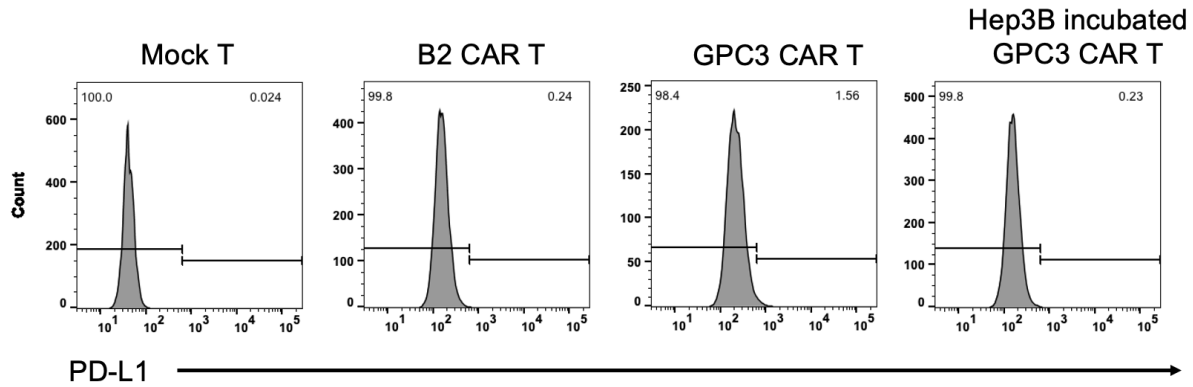

**Supplemental Figure 3.** PD-L1 expression in mock T, CAR (B2) T, GPC3 CAR-T, and Hep3B tumor incubated GPC3 CAR-T cells.

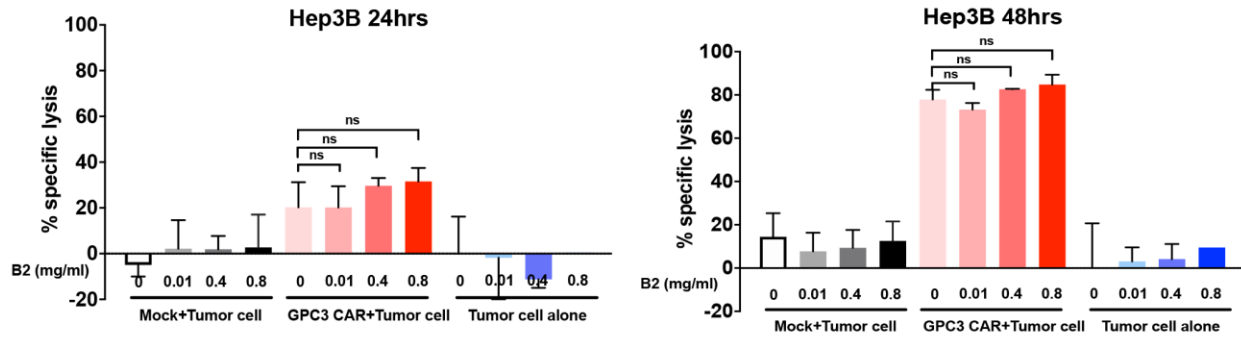

**Supplemental Figure 4.** Monovalent B2 nanobody did not improve GPC3 CAR-T cells killing on Hep3B cells after 24 hours or 48 hours of incubation. Tumor cells alone or mock T cells incubation in the presence of B2 were used as the control in this study. Statistical analyses are shown from three independent experiments. Values represent mean  $\pm$  SEM. \*\* $P < .01$ , \*\*\* $P < .001$ , \*\*\*\* $P < .0001$ , ns, not significant.
